# Supplementary material for: The influence of penguin activity on soil diatom assemblages on King George Island, Antarctica with the description of a new Luticola species
Source: PeerJ. 2022 Jul 4;10:e13624. doi: 10.7717/peerj.13624 (PMC9261928; doi:10.7717/peerj.13624)
Supplement: Supplemental Information 1 — The length and width of the valves and the number of striae in 10 µm. [file peerj-10-13624-s001.xlsx]

## Sheet: Arkusz1
	Luticola sp. dimensions
	minimum	8.1	5.5	14
	maximum	44.8	12	20
	specimen	lenght (µm)	width (µm)	number of striae in 10 µm
	1	20.6	7.8	14
	2	17.7	8.2	14
	3	14.7	6.4	16
	4	23.2	8.6	14
	5	15	7.9	14
	6	20.7	8.1	14
	7	28.2	8.5	15
	8	17.5	7.7	15
	9	23.7	8.9	15
	10	13.6	6.6	18
	11	19.8	8.3	14
	12	23.9	8.2	15
	13	20.2	7.6	15
	14	19.4	8.4	15
	15	19.3	7.7	15
	16	20.7	8	14
	17	19	7.6	14
	18	18.1	8	14
	19	22.5	7.7	14
	20	19.4	8.4	15
	21	22.15	7.5	15
	22	19.3	7.9	14
	23	20.2	7.6	15
	24	17	8	14
	25	12.8	6.6	14
	26	20.5	8.2	14
	27	16.7	7.9	14
	28	33.3	9.5	14
	29	13.6	8	15
	30	32.4	9.6	17
	31	29.2	9	15
	32	31.4	9.9	15
	33	35	9.5	14
	34	35.5	9.3	14
	35	44.8	12	14
	36	38.4	9.9	14
	37	37.2	11	14
	38	39.9	12	14
	39	35.2	9.3	14
	40	41.6	11.8	14
	41	20.7	9.2	16
	42	10.7	6	18
	43	12.1	6.8	16
	44	13.6	7.3	18
	45	17.6	8.7	18
	46	14.7	7.2	16
	47	8.1	5.5	18
	48	21	8.2	16
	49	16.6	7.8	16
	50	14.6	7.4	18
	51	30.5	9.1	15
	52	22.7	7.2	15
	53	26.9	10.3	15
	54	28.4	9	15
	55	11	7.1	18
	56	15.5	7.9	14
	57	19.3	7.7	18
	58	19.2	7.8	16
	59	17.4	8	16
	60	18.3	8.7	16
	61	17.4	8	14
	62	17.3	8.4	16
	63	19.6	7.5	18
	64	21.3	8.6	16
	65	14.3	7	16
	66	17.8	7.6	16
	67	15.6	7.5	18
	68	16.9	7.5	16
	69	14.6	7.3	18
	70	13.5	7.3	18
	71	23.5	8.6	15
	72	24.8	8.1	16
	73	23.1	8.1	16
	74	22	7.9	16
	75	19.6	7.5	14
	76	29.9	9.8	14
	77	21.7	8.5	14
	78	18.4	7.9	16
	79	16.9	7.8	16
	80	23.5	8.5	16
	81	26	8.3	16
	82	19.7	8.6	16
	83	14.6	7.2	18
	84	21.6	8.8	16
	85	23	8.3	16
	86	20.9	7.6	16
	87	28.4	8.6	15
	88	27.2	8.9	14
	89	23.8	7.9	14
	90	12.6	6.6	16
	91	20	7.7	16
	92	25.9	8.9	17
	93	17.9	7.1	16
	94	16.9	7.4	18
	95	17.5	7.3	16
	96	21.2	7.6	16
	97	22.1	8.5	14
	98	18.8	6.9	16
	99	22.2	8	16
	100	14	6.6	18
	101	8.8	5.5	18
	102	11.5	6.5	17
	103	11.8	6.4	18
	104	19.5	8	20
	105	16.6	7.8	18
	106	13.6	7.1	16
	107	12.9	6.7	18
	108	18	7.7	18
	109	15	7	16
	110	14.5	6.9	18
	111	14.5	6.6	20
	112	21.5	8.4	15
	113	12.7	6.8	18
	114	23.9	8.8	16
	115	15.9	7.1	16
	116	18.4	7.6	18
	117	22.9	8.6	15
	118	12.4	7.1	18
	119	15.1	7.4	16
	120	9.7	5.9	20
	121	10.8	6.4	16
	122	20.4	8.3	15
	123	13.2	6.6	18
	124	21.1	8.1	16
	125	16.7	7.2	16
	126	18.8	8.1	15
	127	14	6.7	16
	128	17.1	7.4	16
	129	13.7	6.8	16
	130	14.3	6.5	16
