# Supplementary material for: The influence of penguin activity on soil diatom assemblages on King George Island, Antarctica with the description of a new Luticola species
Source: PeerJ. 2022 Jul 4;10:e13624. doi: 10.7717/peerj.13624 (PMC9261928; doi:10.7717/peerj.13624)
Supplement: Supplemental Information 2 [file peerj-10-13624-s002.xlsx]

## Sheet: Arkusz1
	sample	Conductivity (µS/cm)	pH
	B9.09	73	6.7
	B8.09	363	7.1
	B7.09	206	6.9
	B6.09	282	6
	B5.09	363	6
	B4.09	1579	5.7
	B3.09	1495	4.1
	B2.09	705	4.4
	B1.09	3525	4.3
	B9.06	not measured	not measured
	B8.06
	B7.06
	B6.06
	B5.06
	B4.06
	B3.06
	B2.06
	B1.06
	A1.07	11650	6.1
	A2.07	1516	5.2
	A3.07	1229	5.8
	A4.07	759	5.6
	A5.07	1702	7.3
	A6.07	121	7.9
	A7.07	277	8.1
	A8.07	232	8.1
	A9.07	397	8
	A10.07	164	8
	A11.07	187	7.9
	A12.07	172	8
	A13.07	412	8
	A14.07	1027	8
	A15.07	429	7.9
	A0.15	not measured	not measured
	A1.15	4250	6.6
	A2.15	442	6.4
	A3.15	249	5.8
	A4.15	2100	4.9
	A5.15	489	4.9
	A6.15	130	5.5
	A7.15	128	5.3
	A8.15	179	5.9
	A9.15	257	6
	A10.15	222	6.1
	A11.15	416	5.9
	A12.15	171	7.8
	A13.15	205	7.6
	A14.15	1309	7.4
	A15.15	227	7.6
